# Supplementary material for: Long-Term Effects of Single-Dose Cephalosporin or Macrolide Use on the Prevalence of AmpC and Extended-Spectrum β-Lactamase Producing Escherichia coli in the Feces of Beef Cattle
Source: MDPI journal article supplement (doi:10.3390/microorganisms10102071), 2022-10-20
Supplement: s1 [file s1]

|               |        | MAC  |      |      |      |      |      | MCef |      |      |      |      |      | Difference (Mcef-MAC) |       |       |       |       |       |
|---------------|--------|------|------|------|------|------|------|------|------|------|------|------|------|-----------------------|-------|-------|-------|-------|-------|
| Days          |        | 0    | 7    | 14   | 28   | 56   | 99   | 0    | 7    | 14   | 28   | 56   | 99   | 0                     | 7     | 14    | 28    | 56    | 99    |
| Control       | Obs.   | 53   | 54   | 54   | 54   | 54   | 53   | 53   | 54   | 54   | 54   | 54   | 54   | 53                    | 54    | 54    | 54    | 54    | 54    |
|               | Mean   | 6.53 | 5.31 | 5.20 | 5.96 | 6.01 | 6.55 | 0.34 | 0.20 | 0.45 | 0.19 | 0.20 | 1.76 | -6.20                 | -5.12 | -4.79 | -5.77 | -5.81 | -4.67 |
|               | Median | 6.60 | 5.67 | 5.34 | 5.91 | 6.13 | 6.64 | 0.00 | 0.00 | 0.00 | 0.00 | 0.00 | 0.00 | -6.57                 | -5.63 | -5.30 | -5.87 | -6.10 | -5.82 |
|               | Min    | 4.92 | 0.00 | 0.00 | 4.75 | 0.00 | 4.81 | 0.00 | 0.00 | 0.00 | 0.00 | 0.00 | 0.00 | -7.49                 | -7.43 | -7.47 | -7.33 | -7.53 | -7.38 |
|               | Max    | 7.49 | 7.43 | 7.47 | 7.33 | 7.53 | 7.58 | 6.49 | 5.41 | 6.84 | 6.19 | 5.72 | 7.28 | 0.01                  | 0.50  | 3.60  | -0.44 | 5.26  | 0.00  |
| Tulathromycin | Obs.   | 40   | 40   | 40   | 40   | 38   | 39   | 40   | 40   | 40   | 40   | 39   | 39   | 40                    | 40    | 40    | 40    | 39    | 39    |
|               | Mean   | 6.48 | 5.60 | 5.43 | 6.19 | 6.42 | 6.63 | 0.58 | 0.11 | 0.12 | 0.61 | 0.15 | 1.05 | -5.90                 | -5.49 | -5.30 | -5.58 | -6.25 | -5.58 |
|               | Median | 6.84 | 5.63 | 5.49 | 6.33 | 6.55 | 6.71 | 0.00 | 0.00 | 0.00 | 0.00 | 0.00 | 0.00 | -6.81                 | -5.51 | -5.49 | -6.16 | -6.44 | -6.34 |
|               | Min    | 0.00 | 0.00 | 0.00 | 4.60 | 4.08 | 4.88 | 0.00 | 0.00 | 0.00 | 0.00 | 0.00 | 0.00 | -7.59                 | -7.58 | -7.34 | -7.50 | -7.56 | -7.31 |
|               | Max    | 7.59 | 7.58 | 7.34 | 7.52 | 7.56 | 7.54 | 6.78 | 4.30 | 4.96 | 5.58 | 5.78 | 5.26 | 4.60                  | 0.00  | 0.00  | -0.07 | -1.70 | -1.05 |
| Ceftiofur     | Obs.   | 40   | 40   | 40   | 39   | 39   | 38   | 40   | 40   | 40   | 40   | 39   | 38   | 40                    | 40    | 40    | 40    | 39    | 38    |
|               | Mean   | 6.56 | 1.89 | 5.19 | 6.20 | 6.30 | 6.70 | 0.52 | 0.40 | 1.11 | 0.95 | 0.71 | 1.38 | -6.03                 | -1.49 | -4.08 | -5.09 | -5.59 | -5.13 |
|               | Median | 6.98 | 0.00 | 5.30 | 6.27 | 6.28 | 6.64 | 0.00 | 0.00 | 0.00 | 0.00 | 0.00 | 0.00 | -6.81                 | 0.00  | -4.68 | -6.06 | -6.07 | -6.33 |
|               | Min    | 3.90 | 0.00 | 0.00 | 4.83 | 5.17 | 5.64 | 0.00 | 0.00 | 0.00 | 0.00 | 0.00 | 0.00 | -7.58                 | -5.60 | -6.99 | -7.53 | -7.62 | -7.51 |
|               | Max    | 7.58 | 5.60 | 6.99 | 7.53 | 7.62 | 7.58 | 6.27 | 4.94 | 5.55 | 5.71 | 5.53 | 6.82 | -0.30                 | 3.90  | 0.35  | 0.00  | -0.98 | 0.00  |

Table S1. Descriptive statistics related to log10 CFU counts obtained from MAC, MCef plates and their differences (log10 MCef–MAC) presented by day and individual treatment groups.

| Gene (NCBI GeneBank #)   | Day | Pen | Animal ID | 7-gene MLST | Contig |         |                  | Posterior probability |         | Prediction result | Mobile element | Plasmid and antibiotic resistance genes                                                                 |
|--------------------------|-----|-----|-----------|-------------|--------|---------|------------------|-----------------------|---------|-------------------|----------------|---------------------------------------------------------------------------------------------------------|
|                          |     |     |           |             | ID     | Length  | Cov <sup>a</sup> | Chrom <sup>b</sup>    | Plasmid |                   |                |                                                                                                         |
| blaCMY-2_1 (X91840)      | 0   | 9   | 4243      | 156         | 32     | 271,916 | 26.0             | 0.121                 | 0.879   | Plasmid           | ISEc9          | IncX4_2                                                                                                 |
|                          | 28  | 9   | 4243      | 156         | 34     | 37,036  | 52.8             | 0.121                 | 0.879   | Plasmid           | ISEc9          | IncX4_2                                                                                                 |
|                          | 7   | 9   | 4243      | 156         | 46     | 37,036  | 30.8             | 0.195                 | 0.805   | Plasmid           | ISEc9          | IncX4_2                                                                                                 |
|                          | 99  | 9   | 4249      | 20          | 19     | 100,155 | 34.0             | 0.127                 | 0.873   | Plasmid           | ISEc9, Tn6196  | aadA15_1, aadA2_1, ant(2'')-Ia_1, aph(3'')-Ib_5, aph(6)-Id_1, cmlA1_1, floR_2, sul1_5, sul2_2, tet(A)_6 |
|                          | 0   | 51  | 4300      | 162         | 97     | 2,275   | 152.7            | 0.111                 | 0.889   | Plasmid           | -              | -                                                                                                       |
|                          | 7   | 53  | 4337      | 162         | 33     | 48,375  | 37.7             | 0.759                 | 0.241   | Chromosome        | IS26           | -                                                                                                       |
|                          | 0   | 55  | 4274      | 162         | 67     | 2,263   | 197.0            | 0.641                 | 0.359   | Chromosome        | -              | -                                                                                                       |
| blaCTX-M-1_1 (DQ915955)  | 99  | 54  | 4350      | 744         | 72     | 3,155   | 117.1            | 0.845                 | 0.155   | Chromosome        | -              | -                                                                                                       |
|                          | 28  | 57  | 4315      | 306         | 109    | 3,966   | 60.1             | 0.584                 | 0.416   | Chromosome        | -              | mph(A)                                                                                                  |
|                          | 28  | 57  | 4329      | 306         | 124    | 3,966   | 63.7             | 0.584                 | 0.416   | Chromosome        | -              | mph(A)                                                                                                  |
|                          | 28  | 58  | 4330      | 8443        | 153    | 15,086  | 53.0             | 0.248                 | 0.752   | Plasmid           | -              | mph(A)                                                                                                  |
|                          | 0   | 59  | 4318      | 8443        | 128    | 15,086  | 27.1             | 0.248                 | 0.752   | Plasmid           | -              | mph(A)                                                                                                  |
| blaCTX-M-27 (HQ398215)   | 56  | 56  | 4290      | 17          | 90     | 3,967   | 24.9             | 0.559                 | 0.441   | Chromosome        | IS102          | -                                                                                                       |
|                          | 56  | 58  | 4330      | 17          | 106    | 3,967   | 38.2             | 0.340                 | 0.660   | Plasmid           | IS102          | -                                                                                                       |
| blaCTX-M-32_2 (AJ557142) | 56  | 9   | 4234      | 11460       | 132    | 5,626   | 17.2             | 0.786                 | 0.214   | Chromosome        | -              | -                                                                                                       |
|                          | 0   | 54  | 4263      | 224         | 55     | 4,906   | 19.3             | 0.748                 | 0.252   | Chromosome        | ISKpn26        | -                                                                                                       |
|                          | 0   | 56  | 4295      | 224         | 39     | 4,906   | 22.9             | 0.748                 | 0.252   | Chromosome        | ISKpn26        | -                                                                                                       |
|                          | 14  | 56  | 4295      | 224         | 50     | 4,906   | 26.2             | 0.841                 | 0.159   | Chromosome        | ISKpn26        | -                                                                                                       |
|                          | 0   | 58  | 4268      | 224         | 31     | 4,906   | 46.3             | 0.748                 | 0.252   | Chromosome        | ISKpn26        | -                                                                                                       |
| blaCTX-M-55_1 (DQ810789) | 99  | 56  | 4339      | 1725        | 29     | 35,378  | 21.4             | 0.119                 | 0.881   | Plasmid           | ISEc9, IS629   | IncFIC(FII)_1                                                                                           |
| blaTEM-1A_1 (HM749966)   | 99  | 54  | 4350      | 744         | 55     | 8,617   | 214.4            | 0.126                 | 0.874   | Plasmid           | -              | aph(3'')-Ib_5, aph(6)-Id_1, sul2_2, tet(A)_6                                                            |
|                          | 0   | 54  | 4263      | 224         | 49     | 13,748  | 23.0             | 0.540                 | 0.460   | Chromosome        | ISVsa3         | aph(3'')-Ib_5, aph(6)-Id_1, floR_2, sul2_2, tet(A)_6                                                    |
|                          | 0   | 56  | 4295      | 224         | 33     | 13,748  | 27.5             | 0.540                 | 0.460   | Chromosome        | ISVsa3         | aph(3'')-Ib_5, aph(6)-Id_1, floR_2, sul2_2, tet(A)_6                                                    |
|                          | 14  | 56  | 4295      | 224         | 40     | 13,748  | 35.8             | 0.022                 | 0.978   | Plasmid           | ISVsa3         | aph(3'')-Ib_5, aph(6)-Id_1, floR_2, sul2_2, tet(A)_6                                                    |
|                          | 0   | 58  | 4268      | 224         | 28     | 13,748  | 43.7             | 0.022                 | 0.978   | Plasmid           | ISVsa3         | aph(3'')-Ib_5, aph(6)-Id_1, floR_2, sul2_2, tet(A)_6                                                    |
|                          | 28  | 58  | 4330      | 8443        | 84     | 3,965   | 54.5             | 0.029                 | 0.971   | Plasmid           | ISVsa3         | aph(3'')-Ib_5, aph(6)-Id_1, floR_2, sul2_2, tet(A)_6                                                    |
|                          | 0   | 59  | 4318      | 8443        | 79     | 3,965   | 27.7             | 0.029                 | 0.971   | Plasmid           | ISVsa3         | aph(3'')-Ib_5, aph(6)-Id_1, floR_2, sul2_2, tet(A)_6                                                    |
| blaTEM-1B_1 (AY458016)   | 0   | 9   | 4243      | 156         | 4      | 37,035  | 105.7            | 0.979                 | 0.021   | Chromosome        | Tn2            | -                                                                                                       |
|                          | 28  | 9   | 4243      | 156         | 3      | 271,916 | 31.6             | 0.979                 | 0.021   | Chromosome        | Tn2            | -                                                                                                       |
|                          | 7   | 9   | 4243      | 156         | 34     | 59,819  | 20.7             | 0.977                 | 0.023   | Chromosome        | Tn2            | -                                                                                                       |

<sup>a</sup> coverage

<sup>b</sup> chromosome

Table S2. Mobile genetic elements, antibiotic resistance genes, and plasmids defined in the contigs carrying a bla gene and their quality metrics and origin of predictions by 7-gene MLST, day, pen, and individual animals.

| ESBL/AmpC phenotype | Day | Pen | ID   | Trt <sup>a</sup> | 7-gene MLST | AMR phenotype                                                                                                                                                              | AMR genotype <sup>b</sup>                                                                                                             | Plasmid <sup>c</sup>       |
|---------------------|-----|-----|------|------------------|-------------|----------------------------------------------------------------------------------------------------------------------------------------------------------------------------|---------------------------------------------------------------------------------------------------------------------------------------|----------------------------|
| AmpC                | 99  | 9   | 4249 | cont             | 20          | Amoxicillin-clavulanic acid, Ampicillin, Ceftiofur, Ceftriaxone, Chloramphenicol, Gentamicin, Streptomycin, Sulfisoxazole, Tetracycline                                    | blaCMY-2, cmlA1, floR, sul1, sul2, tet(A), tetC, aadA15, aadA2, ant(2'')-Ia, aph(3'')-Ib, aph(6)-Id,                                  | IncA/C2, IncFII            |
| AmpC                | 0   | 9   | 4243 | cef              | 156         | Amoxicillin-clavulanic acid, Ampicillin, Cefoxitin, Ceftiofur, Ceftriaxone, Chloramphenicol, Ciprofloxacin, Nalidixic acid, Sulfisoxazole, Tetracycline                    | blaCMY-2, blaTEM-1, floR, gyrA, parC, sul2, tet(A), tet(B), tet(M),                                                                   | IncX4, IncY                |
| AmpC                | 7   | 9   | 4243 | cef              | 156         | Amoxicillin-clavulanic acid, Ampicillin, Cefoxitin, Ceftiofur, Ceftriaxone, Chloramphenicol, Ciprofloxacin, Nalidixic acid, Streptomycin, Sulfisoxazole, Tetracycline      | blaCMY-2, blaTEM-1, floR, gyrA, parC, sul2, tet(A), tet(B), tet(M),                                                                   | IncX4, IncY                |
| AmpC                | 28  | 9   | 4243 | cef              | 156         | Amoxicillin-clavulanic acid, Ampicillin, Cefoxitin, Ceftiofur, Ceftriaxone, Chloramphenicol, Ciprofloxacin, Nalidixic acid, Sulfisoxazole, Tetracycline                    | blaCMY-2, blaTEM-1, floR, gyrA, parC, sul2, tet(A), tet(B), tet(M),                                                                   | IncX4, IncY                |
| AmpC                | 0   | 55  | 4274 | cef              | 162         | Amoxicillin-clavulanic acid, Ampicillin, Cefoxitin, Ceftiofur, Ceftriaxone, Tetracycline                                                                                   | blaCMY-2, tet(A), tet(B), tet(M),                                                                                                     | IncHI1B                    |
| AmpC                | 0   | 51  | 4300 | tul              | 162         | Amoxicillin-clavulanic acid, Ampicillin, Cefoxitin, Ceftiofur, Ceftriaxone, Tetracycline                                                                                   | blaCMY-2, tet(A), tet(B), tet(M)                                                                                                      | IncHI1B                    |
| AmpC                | 7   | 53  | 4337 | cont             | 162         | Amoxicillin-clavulanic acid, Ampicillin, Cefoxitin, Ceftiofur, Ceftriaxone, Tetracycline                                                                                   | blaCMY-2, tet(A), tet(B), tet(M),                                                                                                     | IncHI1B                    |
| AmpC                | 28  | 57  | 4329 | cef              | 306         | Amoxicillin-clavulanic acid, Ampicillin, Cefoxitin, Ceftiofur, Ceftriaxone, Chloramphenicol, Ciprofloxacin*, Streptomycin, Sulfisoxazole, Tetracycline                     | blaCTX-M-1, floR, qnrB19, sul2, tet(A), aph(3'')-Ib, aph(6)-Id, mph(A)                                                                | IncFII, IncR, IncX1        |
| ESBL                | 56  | 56  | 4290 | tul              | 17          | Ampicillin, Ceftiofur, Ceftriaxone                                                                                                                                         | blaCTX-M-27                                                                                                                           | p0111, IncB/O/K/Z, IncFII  |
| ESBL                | 56  | 58  | 4330 | tul              | 17          | Ampicillin, Ceftiofur, Ceftriaxone                                                                                                                                         | blaCTX-M-27                                                                                                                           | p0111, IncB/O/K/Z, IncFII  |
| ESBL                | 0   | 54  | 4263 | cont             | 224         | Ampicillin, Ceftiofur, Ceftriaxone, Chloramphenicol, Ciprofloxacin, Nalidixic acid, Sulfisoxazole, Tetracycline                                                            | blaCTX-M-32, blaTEM-1, floR, gyrA, parC, parE, sul2, tet(A), aph(3'')-Ib, aph(6)-Id                                                   | IncFIC(FII), IncY          |
| ESBL                | 0   | 58  | 4268 | cont             | 224         | Ampicillin, Ceftiofur, Ceftriaxone, Chloramphenicol, Ciprofloxacin, Nalidixic acid, Sulfisoxazole, Tetracycline                                                            | blaCTX-M-32, blaTEM-1, floR, gyrA, parC, parE, sul2, tet(A), aph(3'')-Ib, aph(6)-Id                                                   | IncFIC(FII), IncY          |
| ESBL                | 0   | 56  | 4295 | cont             | 224         | Ampicillin, Ceftiofur, Ceftriaxone, Chloramphenicol, Ciprofloxacin, Nalidixic acid, Sulfisoxazole, Tetracycline                                                            | blaCTX-M-32, blaTEM-1, floR, gyrA, parC, parE, sul2, tet(A), aph(3'')-Ib, aph(6)-Id                                                   | IncFIC(FII), IncY          |
| ESBL                | 14  | 56  | 4295 | cont             | 224         | Ampicillin, Ceftiofur, Ceftriaxone, Chloramphenicol, Ciprofloxacin, Nalidixic acid, Sulfisoxazole, Tetracycline                                                            | blaCTX-M-32, blaTEM-1, floR, gyrA, parC, parE, sul2, tet(A), aph(3'')-Ib, aph(6)-Id                                                   | IncFIC(FII), IncY          |
| ESBL                | 28  | 57  | 4315 | cef              | 306         | Ampicillin, Ceftiofur, Ceftriaxone, Chloramphenicol, Ciprofloxacin, Streptomycin, Sulfisoxazole, Tetracycline                                                              | blaCTX-M-1, floR, qnrB19, sul2, tet(A), aph(3'')-Ib, aph(6)-Id,, mph(A)                                                               | IncFII(pSE11), IncR, IncX1 |
| ESBL                | 99  | 54  | 4350 | cont             | 744         | Ampicillin, Ceftiofur, Ceftriaxone, Azithromycin, Chloramphenicol, Ciprofloxacin, Nalidixic acid, Streptomycin, Sulfisoxazole, Tetracycline, Trimethoprim-sulfamethoxazole | blaCTX-M-1, blaTEM-1, catA1, floR, gyrA, parC, sul1, sul2, tet(A), tet(B), aadA5, aph(3'')-Ia, aph(3'')-Ib, aph(6)-Id, dfrA17, mph(A) | IncR                       |
| ESBL                | 99  | 56  | 4339 | tul              | 1725        | Ampicillin, Ceftiofur, Ceftriaxone, Chloramphenicol, Sulfisoxazole, Tetracycline                                                                                           | blaCTX-M-55, floR, sul3, tet(B), aph(3'')-Ia                                                                                          | IncFIB                     |
| ESBL                | 0   | 59  | 4318 | cont             | 8443        | Ampicillin, Ceftiofur, Ceftriaxone, Chloramphenicol, Ciprofloxacin*, Streptomycin, Sulfisoxazole, Tetracycline                                                             | blaCTX-M-1, blaTEM-1, floR, qnrB19, sul2, tet(A), aph(3'')-Ib, aph(6)-Id,, mph(A)                                                     | IncR                       |
| ESBL                | 28  | 58  | 4330 | tul              | 8443        | Ampicillin, Ceftiofur, Ceftriaxone, Chloramphenicol, Ciprofloxacin*, Sulfisoxazole, Tetracycline                                                                           | blaCTX-M-1, blaTEM-1, floR, qnrB19, sul2, tet(A), aph(3'')-Ib, aph(6)-Id, mph(A)                                                      | IncR                       |
| ESBL                | 56  | 9   | 4234 | cef              | 11460       | Ampicillin, Ceftiofur, Ceftriaxone                                                                                                                                         | blaCTX-M-32, parC                                                                                                                     | IncFII(pSE11)              |

<sup>a</sup> Treatments: cef, ceftiofur; cont, control; tul, tulathromycin

<sup>b</sup> Point mutations are screened with %90 ID and 60% coverage and acquired resistance genes are screened with 97% ID and 97% coverage thresholds

<sup>c</sup> Plasmids are screened with 97% ID and 97% coverage thresholds

**Table S3. Genotypic and phenotypic AMR resistance and plasmidal distributions of ESBL and AmpC phenotype E. coli recovered from the study.**
